# Supplementary material for: Design of organosulfonic acid functionalized organosilica hollow nanospheres for efficient conversion of furfural alcohol to ethyl levulinate
Source: Royal Society of Chemistry journal article supplement (doi:10.1039/c4gc02161d), 2015-01-01
Supplement: c4gc02161d1.pdf [file c4gc02161d1.pdf]

**Electronic supplementary information (ESI) for**

**“Design of organosulfonic acid functionalized organosilica hollow  
nanospheres for efficient conversion of furfural alcohol to ethyl  
levulinate”**

**Fig. S1** GC-MS analysis result of ethanolysis of furfural alcohol to produce ethyl levulinate catalyzed by  $\text{PrSO}_3\text{H-Et-HNS9.0}$  after the reaction proceeded for (a) 30 min and (b) 60 min.

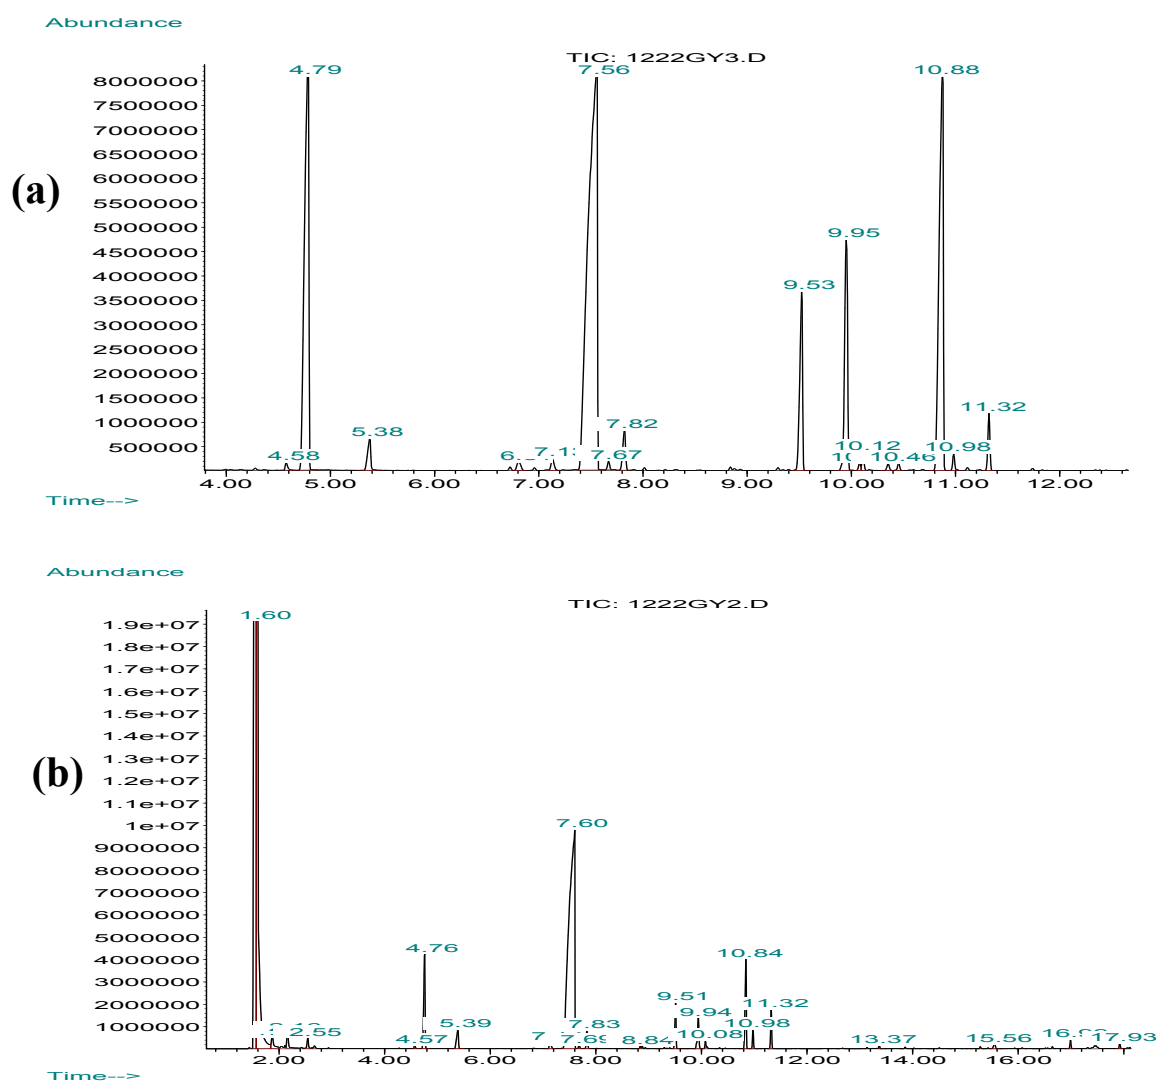

The peak with the retention time of 4.79 min in Fig. S1a or 4.76 min in Fig. S1b corresponds to ethoxymethylfuran (EMF), and its concentration decreases obviously with increasing the reaction time.

HP6890GC-5973MSD was equipped with HP-5MS capillary column (30 m length, 0.25 mm i.d., 0.25  $\mu\text{m}$  film thickness) and helium as the carrier gas at 1  $\text{mL min}^{-1}$ .

The temperature program was as follows: 150 °C for 2 min, 5 °C min<sup>-1</sup> up to 250 °C, hold time of 10 min. The GC injector and MS ion source temperatures were 250 °C and 230 °C, respectively. The MS detector was operated in the EI mode at 70 eV with a scanning range of m/z 20–500.
